# Supplementary material
Source: PubMed Central journal article supplement (PMC3731677)
Supplement: Supp_Fig2.pdf [file Supp_Fig2.pdf]

**A Collagen IV Production**

| RGDS vs. | IKVAV | IKVAV/RGDS | YIGSR | YIGSR/RGDS |
|----------|-------|------------|-------|------------|
| 7 days   | ns    | *          | **    | **         |
| 14 days  | ns    | **         | **    | **         |
| 28 days  | **    | **         | **    | **         |

| IKVAV vs. | IKVAV/RGDS | YIGSR | YIGSR/RGDS |
|-----------|------------|-------|------------|
| 7 days    | ns         | **    | **         |
| 14 days   | **         | **    | **         |
| 28 days   | *          | **    | **         |

| IKVAV/RGDS vs. | YIGSR | YIGSR/RGDS |
|----------------|-------|------------|
| 7 days         | **    | **         |
| 14 days        | **    | **         |
| 28 days        | **    | **         |

| YIGSR vs. | YIGSR/RGDS |
|-----------|------------|
| 7 days    | **         |
| 14 days   | **         |
| 28 days   | **         |

**B Laminin Production**

| RGDS vs. | IKVAV | IKVAV/RGDS | YIGSR | YIGSR/RGDS |
|----------|-------|------------|-------|------------|
| 7 days   | ns    | ns         | ns    | ns         |
| 14 days  | ns    | ns         | *     | **         |
| 28 days  | ns    | ns         | ns    | ns         |

| IKVAV vs. | IKVAV/RGDS | YIGSR | YIGSR/RGDS |
|-----------|------------|-------|------------|
| 7 days    | ns         | *     | *          |
| 14 days   | ns         | *     | *          |
| 28 days   | ns         | ns    | *          |

| IKVAV/RGDS vs. | YIGSR | YIGSR/RGDS |
|----------------|-------|------------|
| 7 days         | ns    | ns         |
| 14 days        | ns    | ns         |
| 28 days        | ns    | ns         |

| YIGSR vs. | YIGSR/RGDS |
|-----------|------------|
| 7 days    | ns         |
| 14 days   | ns         |
| 28 days   | ns         |

**SUPPLEMENTARY FIG. S2.** Bonferroni *post hoc* analysis shows individual significant differences between laminin peptide groups and their effect on (A) collagen IV production and (B) laminin production. \* $p < 0.05$ ; \*\* $p < 0.01$ ; ns, not significant.
